# Supplementary material for: Considerations for Oral Cholera Vaccine Use during Outbreak after Earthquake in Haiti, 2010−2011
Source: PubMed Central journal article supplement (PMC3310586; doi:10.3201/eid1711.110822), 2011-11
Supplement: 11-0822-Techapp1_4p.pdf [file 11-0822-Techapp1_4p.pdf]

# Considerations for Oral Cholera Vaccine Use during 2010–2011 Outbreak after Earthquake in Haiti

## Technical Appendix 1

### Bibliography

#### **Additional World Health Organization (WHO) Documents**

World Health Organization. Meeting of the Strategic Advisory Group of Experts on Immunization, October 2009—conclusions and recommendations. Geneva: World Health Organization; 11 December 2009.

World Health Organization. Potential use of oral cholera vaccines in emergency situations. Report of a WHO meeting. Geneva: World Health Organization; May 1999.

#### **PAHO and CDC Position Recommendations for Oral Cholera Vaccine Use in Haiti Early During the Outbreak in 2010**

Pan American Health Organization. PAHO Position on Cholera Vaccination in Haiti, Version October 27, 2010: Pan American Health Organization; 2010.

Centers for Disease Control and Prevention. CDC Memo to the Record: Cholera vaccination in the context of the outbreak in Haiti (unpublished). November 1, 2010.

#### **Additional Discussions and Ministère de la Santé Publique et de la Population (MSPP) Position on Cholera Vaccine Use for Haiti**

Danovaro-Holliday MC. Ad-hoc scientific consultation on potential role of cholera vaccination in the Americas in the context of the 2010 outbreak in the Hispaniola island. Global Immunization News. Geneva: World Health Organization (WHO). 28 January 2011.

Pan American Health Organization. Experts Call for International Cholera Vaccine Stockpile. 2010 [cited April 20, 2011]. [http://new.paho.org/hq/index2.php?option=com\\_content&do\\_pdf=1&id=4569](http://new.paho.org/hq/index2.php?option=com_content&do_pdf=1&id=4569)

Cyranoski D. Cholera vaccine plan splits experts. *Nature*. 2011;469:273–4. [PubMed doi:10.1038/469273a](#)

### **Oral Cholera Vaccines Characteristics and Status**

Shanchol Product Information. 2009 [cited 2010 Nov 22].

<http://www.shanthabiotech.com/images/Shanchol%20PI%20of2.jpg>

World Health Organization. Use of the two-dose oral cholera vaccine in the context of a major natural disaster. Report of a mass vaccination campaign in Aceh Province, Indonesia, 2005. Geneva: World Health Organization; 2006.

Clemens JD, Sack DA, Harris JR, van Loon F, Chakraborty J, Ahmed F, et al. Field trial of oral cholera vaccines in Bangladesh: results from three-year follow-up. *Lancet*. 1990;335:270–3. [PubMed doi:10.1016/0140-6736\(90\)90080-O](#)

Lucas MES, Deen JL, von Seidlein L, Wang X-Y, Ampuero J, Puri M, et al. Effectiveness of Mass Oral Cholera Vaccination in Beira, Mozambique. *N Engl J Med*. 2005;352:757–67. [PubMed doi:10.1056/NEJMoa043323](#)

Sur D, Lopez AL, Kanungo S, Paisley A, Manna B, Ali M, et al. Efficacy and safety of a modified killed-whole-cell oral cholera vaccine in India: an interim analysis of a cluster-randomised, double-blind, placebo-controlled trial. *Lancet*. 2009;374:1694–702. [PubMed doi:10.1016/S0140-6736\(09\)61297-6](#)

van Loon FPL, Clemens JD, Chakraborty J, Rao MR, Kay BA, Sack DA, et al. Field trial of inactivated oral cholera vaccines in Bangladesh: results from 5 years of follow-up. *Vaccine*. 1996;14:162–6. [PubMed doi:10.1016/0264-410X\(95\)00122-H](#)

Sanchez JL, Vasquez B, Begue RE, Meza R, Castellares G, Cabezas C, et al. Protective efficacy of oral whole-cell/recombinant-B-subunit cholera vaccine in Peruvian military recruits. *Lancet*. 1994;344:1273–6. [PubMed doi:10.1016/S0140-6736\(94\)90755-2](#)

Taylor DN, Cárdenas V, Sanchez JL, Bégué RE, Gilman R, Bautista C, et al. Two-year study of the protective efficacy of the oral whole cell plus recombinant B subunit cholera vaccine in Peru. *J Infect Dis*. 2000;181:1667–73. [PubMed doi:10.1086/315462](#)

Ali M, Emch M, von Seidlein L, Yunus M, Sack DA, Rao M, et al. Herd immunity conferred by killed oral cholera vaccines in Bangladesh: a reanalysis. *Lancet*. 2005;366:44–9. [PubMed doi:10.1016/S0140-6736\(05\)66550-6](#)

Longini IM Jr, Nizam A, Ali M, Yunus M, Shenvi N, Clemens JD. Controlling endemic cholera with oral vaccines. *PLoS Med.* 2007;4:e336. [PubMed doi:10.1371/journal.pmed.0040336](#)

Jeuland M, Cook J, Poulos C, Clemens J, Whittington D, Group DCES. Cost-effectiveness of new-generation oral cholera vaccines: a multisite analysis. *Value Health.* 2009;12:899–908. [PubMed doi:10.1111/j.1524-4733.2009.00562.x](#)

### **Prequalification of Vaccines for United Nations Purchase**

World Health Organization. A system for the prequalification of vaccines for UN supply. 2010 [cited December 1, 2010];  
[http://www.who.int/immunization\\_standards/vaccine\\_quality/pq\\_system/en/index.html](http://www.who.int/immunization_standards/vaccine_quality/pq_system/en/index.html)

DeRoeck D, Bawazir SA, Carrasco P, Kaddar M, Brooks A, Fitzsimmons J, et al. Regional group purchasing of vaccines: review of the Pan American Health Organization EPI revolving fund and the Gulf Cooperation Council group purchasing program. *Int J Health Plann Manage.* 2006;21:23–43. [PubMed doi:10.1002/hpm.822](#)

### **Immunity With Natural Cholera Infection**

Clemens JD, van Loon F, Sack DA, Rao MR, Ahmed F, Chakraborty J, et al. Biotype as determinant of natural immunising effect of cholera. *Lancet.* 1991;337:883–4. [PubMed doi:10.1016/0140-6736\(91\)90207-6](#)

Koelle K, Rodo X, Pascual M, Yunus M, Mostafa G. Refractory periods and climate forcing in cholera dynamics. *Nature.* 2005;436:696–700. [PubMed doi:10.1038/nature03820](#)

### **Previous Experiences with Mass OCV Campaigns in Complex Emergency Settings**

Legros D, Paquet C, Perea W, Marty I, Mugisha NK, Royer H, et al. Mass vaccination with a two-dose oral cholera vaccine in a refugee camp. *Bull World Health Organ.* 1999;77:837–42. [PubMed](#)

World Health Organization. Use of the two-dose oral cholera vaccine in the context of a major natural disaster. Report of a mass vaccination campaign in Aceh Province, Indonesia, 2005. Geneva: World Health Organization; 2006.

Draft Background Paper on the Integration of Oral Cholera Vaccines into Global Cholera Control Programs. Presented to SAGE in October 2009. Geneva: WHO Strategic Advisory Group of Experts on Immunization; 2009.

## **Recent Published Models Regarding Reactive Cholera Vaccination in Epidemic Settings**

Andrews JR, Basu S. Transmission dynamics and control of cholera in Haiti: an epidemic model. *Lancet*. 2011;377:1248–55. [PubMed doi:10.1016/S0140-6736\(11\)60273-0](#)

Chao DL, Halloran ME, Longini IM. Vaccination strategies for epidemic cholera in Haiti with implications for the developing world. *Proc Natl Acad Sci U S A*. 2011;108:7081–5. [PubMed doi:10.1073/pnas.1102149108](#)

Reyburn R, Deen JL, Grais RF, Bhattacharya SK, Sur D, Lopez AL, et al. The case for reactive mass oral cholera vaccinations. *PLoS Negl Trop Dis*. 2011;5:e952. [PubMed doi:10.1371/journal.pntd.0000952](#)

## **Cholera Vaccine Stockpile**

Danovaro-Holliday MC. Ad-hoc scientific consultation on potential role of cholera vaccination in the Americas in the context of the 2010 outbreak in the Hispaniola island. *Global Immunization News*. Geneva: World Health Organization (WHO). 28 January 2011.

World Health Organization. Meeting of the Strategic Advisory Group of Experts on Immunization, October 2009 – conclusions and recommendations. Geneva: World Health Organization; 11 December 2009.

World Health Organization. Potential use of oral cholera vaccines in emergency situations. Report of a WHO meeting. Geneva: World Health Organization; May 1999.

Chao DL, Halloran ME, Longini IM. Vaccination strategies for epidemic cholera in Haiti with implications for the developing world. *Proc Natl Acad Sci U S A*. 2011;108:7081–5. [PubMed doi:10.1073/pnas.1102149108](#)

Waldor MK, Hotez PJ, Clemens JD. A national cholera vaccine stockpile — a new humanitarian and diplomatic resource. *N Engl J Med*. 2010;363:2279–82. [PubMed doi:10.1056/NEJMp1012300](#)

Applied Strategies Consulting. GAVI Vaccine Investment Strategy: Cholera Analysis: GAVI; 2008.

## **Cholera Outbreaks in Other Countries Coincident with the Outbreak in Haiti**

ProMED-mail. Cholera, Diarrhea and Dysentery Update 2010 (26). ProMED-mail 1 Nov 2010. <http://www.promedmail.org>

ProMED-mail. Cholera, Diarrhea and Dysentery Update 2010 (27). ProMED-mail 9 Nov 2010. <http://www.promedmail.org>
